# Supplementary material
Source: publisher figshare collection journal article supplement (https://gsapubs.figshare.com/articles/dataset/_/20224125)
Supplement: Supplementary file 1 [file 1]

Lovell Wash Syncline Area

# Bitter Ridge Limestone Sections

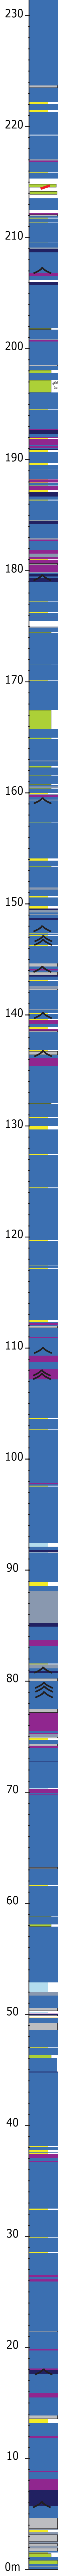

Correlation based on tephrochronology and stratigraphy  
Correlation based on stratigraphy  
Correlations dashed where less robust

## Area A

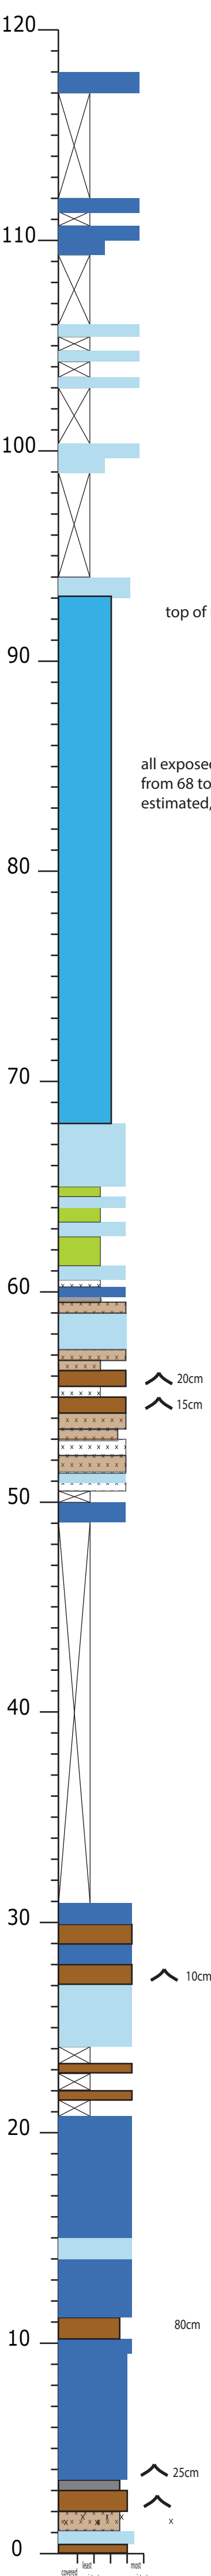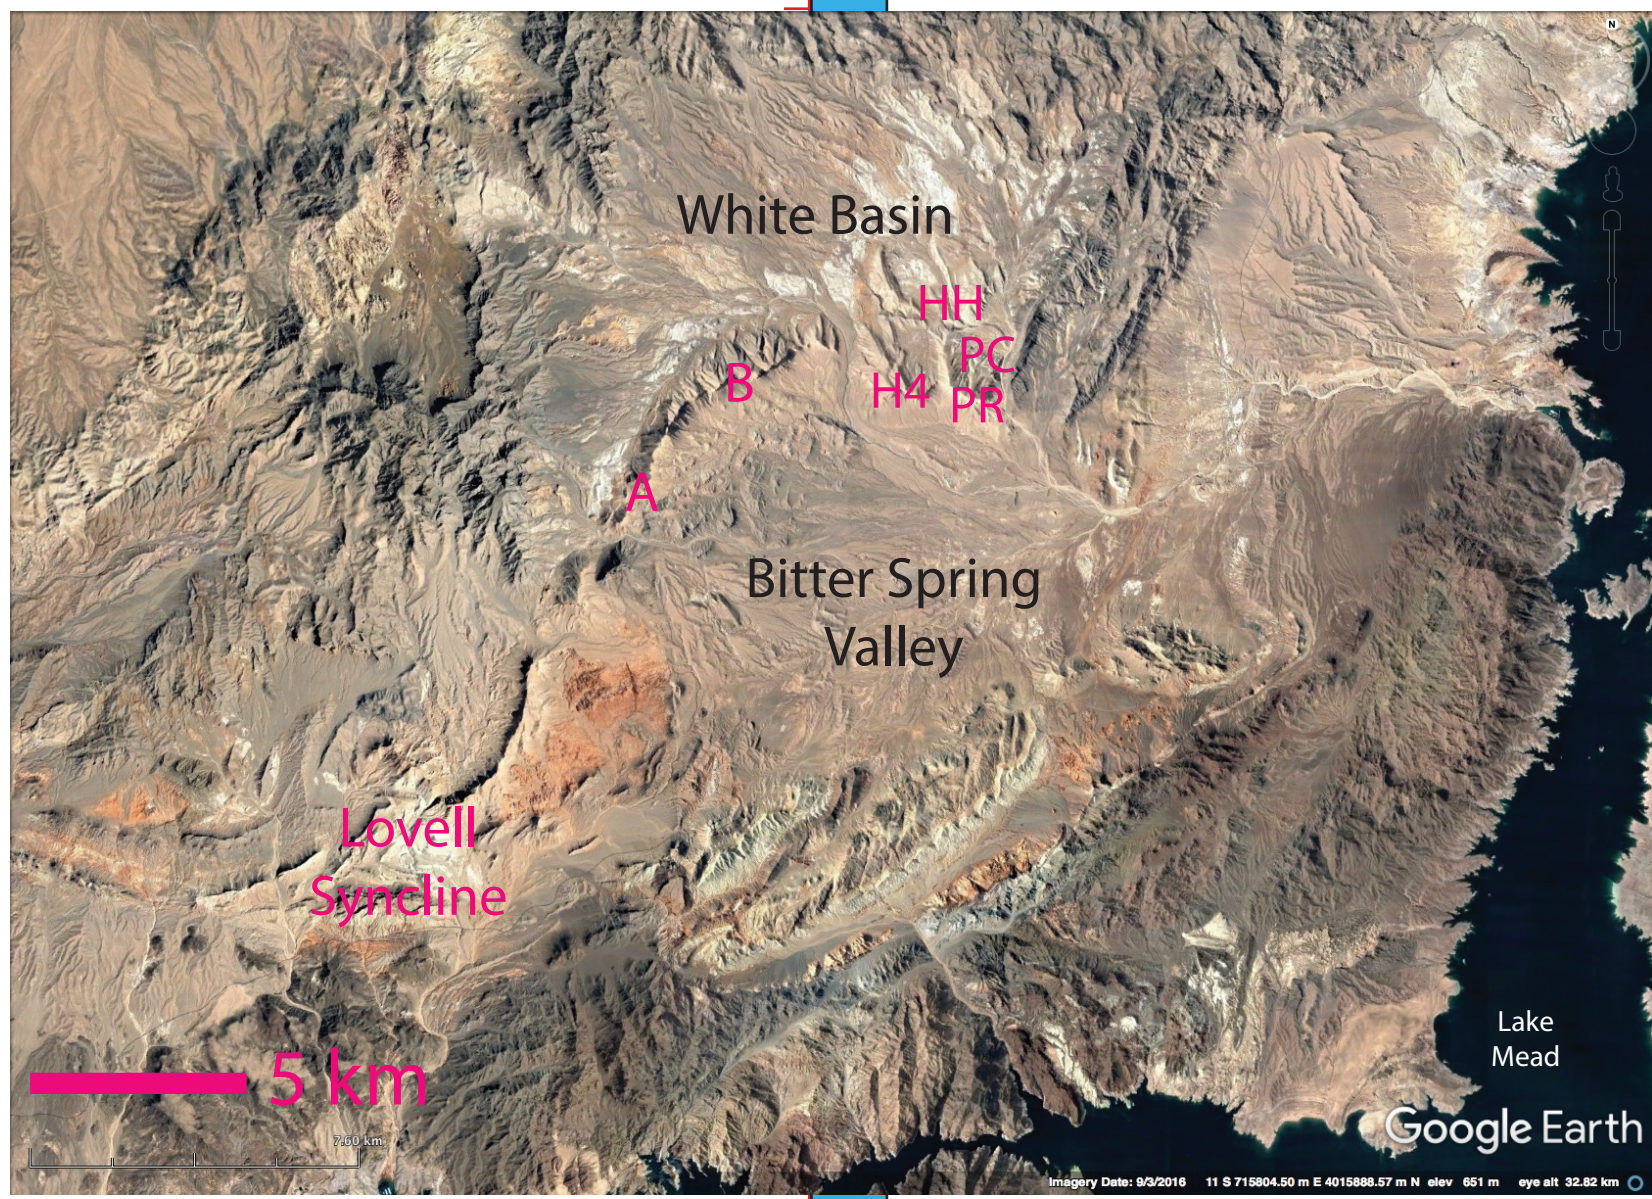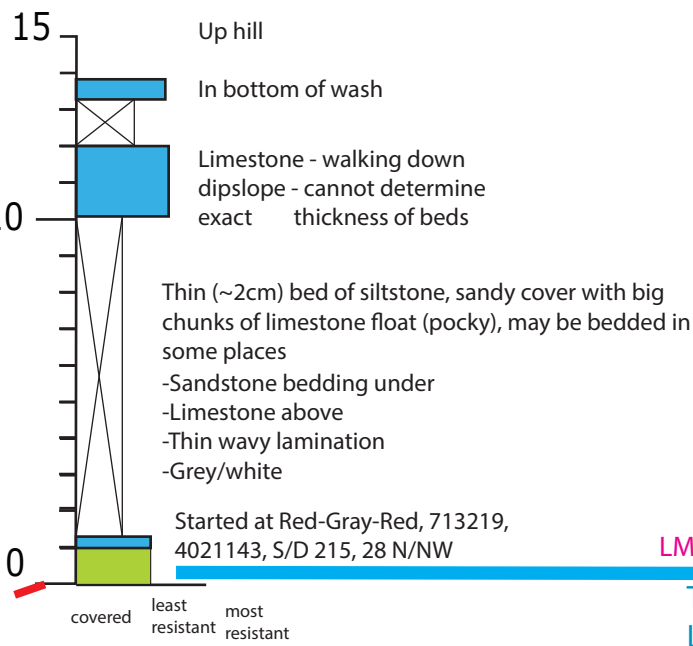

Tephrochronology results:  
LMTH122 and LMLL216-218 match

## B

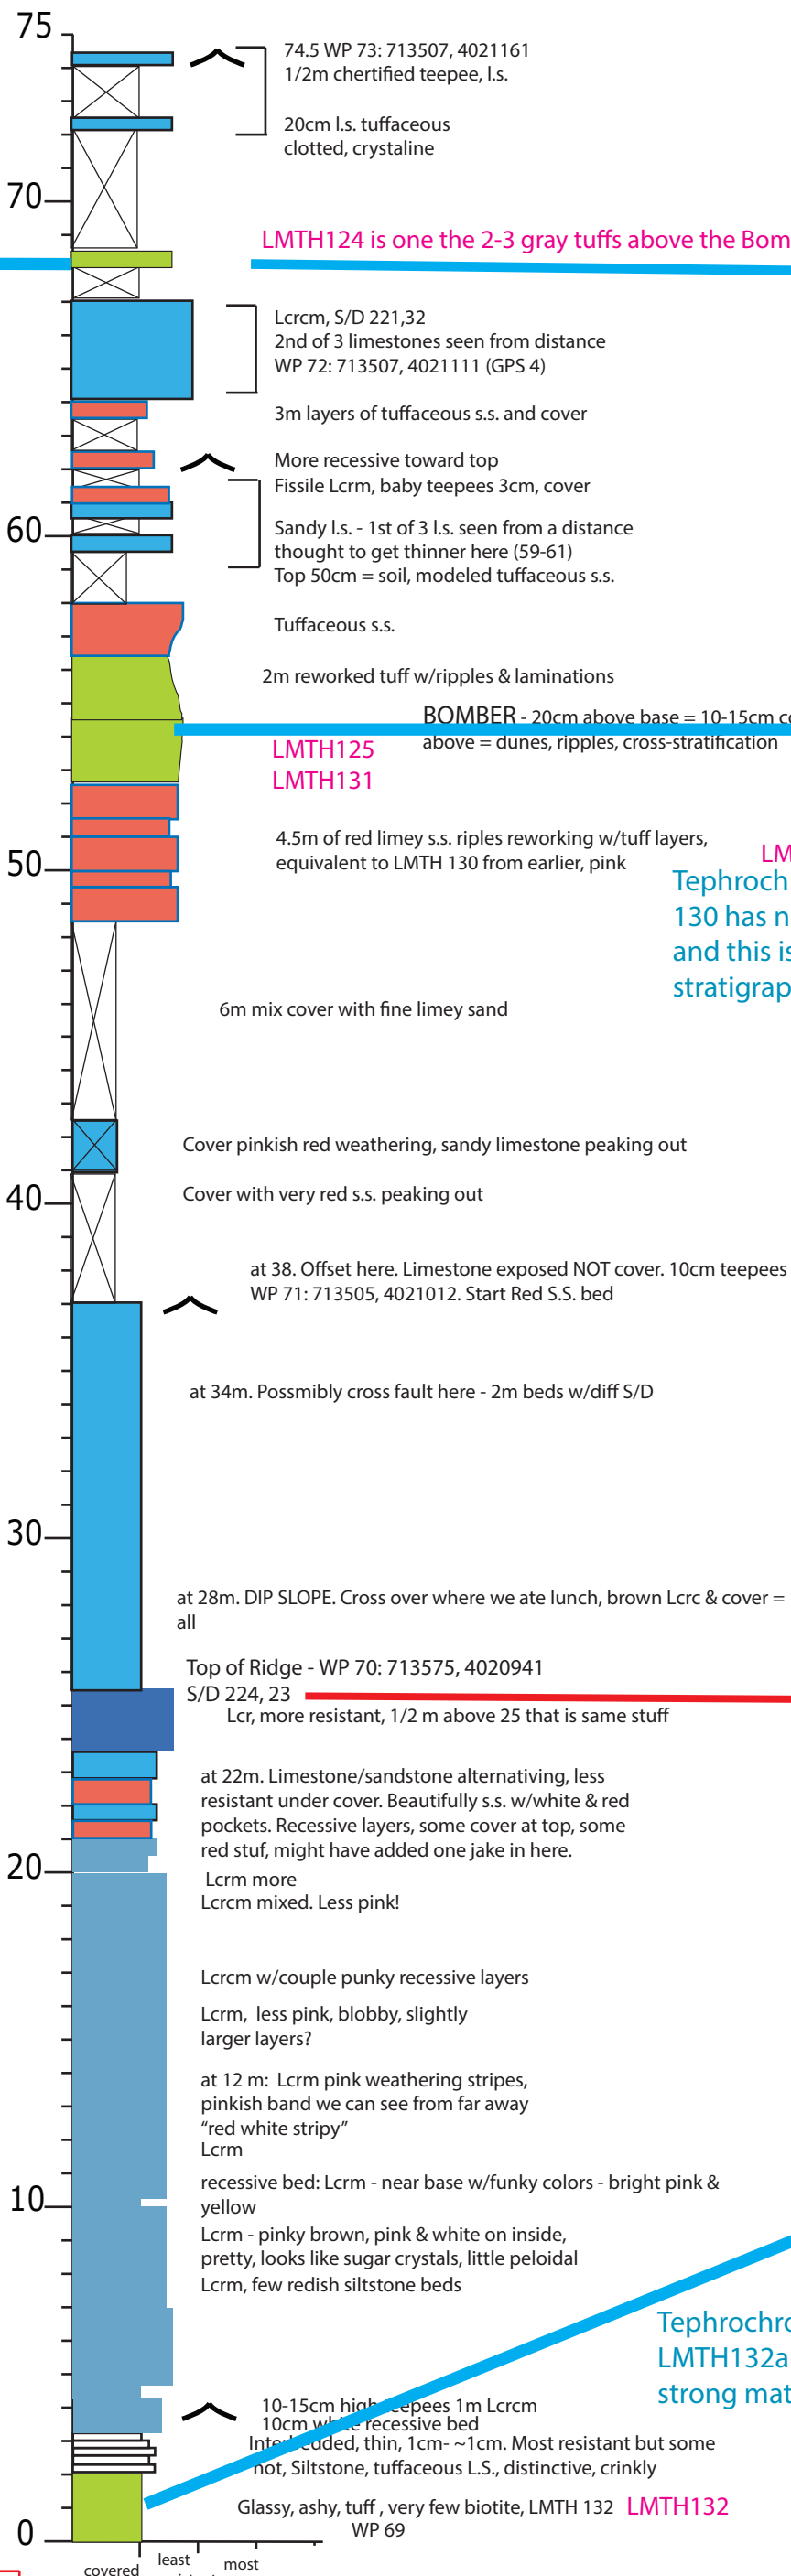

Tephrochronology results:  
LMTH132 and LMLL219 strong match

Tephrochronology results:  
LMTH130 has no match and this is works stratigraphically

Tephrochronology results:  
LMTH124 is one the 2-3 gray tufts above the Bomber

Tephrochronology results:  
LMTH125 and LMLL211 and LMLL 221 strong match

Tephrochronology results:  
LMTH132 and LMLL219 strong match

Tephrochronology results:  
LMTH130 has no match and this is works stratigraphically

Tephrochronology results:  
LMTH124 is one the 2-3 gray tufts above the Bomber

Tephrochronology results:  
LMTH125 and LMLL211 and LMLL 221 strong match

Tephrochronology results:  
LMTH132 and LMLL219 strong match

Tephrochronology results:  
LMTH130 has no match and this is works stratigraphically

Tephrochronology results:  
LMTH124 is one the 2-3 gray tufts above the Bomber

Tephrochronology results:  
LMTH125 and LMLL211 and LMLL 221 strong match

Tephrochronology results:  
LMTH132 and LMLL219 strong match

Tephrochronology results:  
LMTH130 has no match and this is works stratigraphically

Tephrochronology results:  
LMTH124 is one the 2-3 gray tufts above the Bomber

Tephrochronology results:  
LMTH125 and LMLL211 and LMLL 221 strong match

Tephrochronology results:  
LMTH132 and LMLL219 strong match

Tephrochronology results:  
LMTH130 has no match and this is works stratigraphically

Tephrochronology results:  
LMTH124 is one the 2-3 gray tufts above the Bomber

Tephrochronology results:  
LMTH125 and LMLL211 and LMLL 221 strong match

Tephrochronology results:  
LMTH132 and LMLL219 strong match

Tephrochronology results:  
LMTH130 has no match and this is works stratigraphically

Tephrochronology results:  
LMTH124 is one the 2-3 gray tufts above the Bomber

Tephrochronology results:  
LMTH125 and LMLL211 and LMLL 221 strong match

Tephrochronology results:  
LMTH132 and LMLL219 strong match

Tephrochronology results:  
LMTH130 has no match and this is works stratigraphically

Tephrochronology results:  
LMTH124 is one the 2-3 gray tufts above the Bomber

Tephrochronology results:  
LMTH125 and LMLL211 and LMLL 221 strong match

Tephrochronology results:  
LMTH132 and LMLL219 strong match

## H4

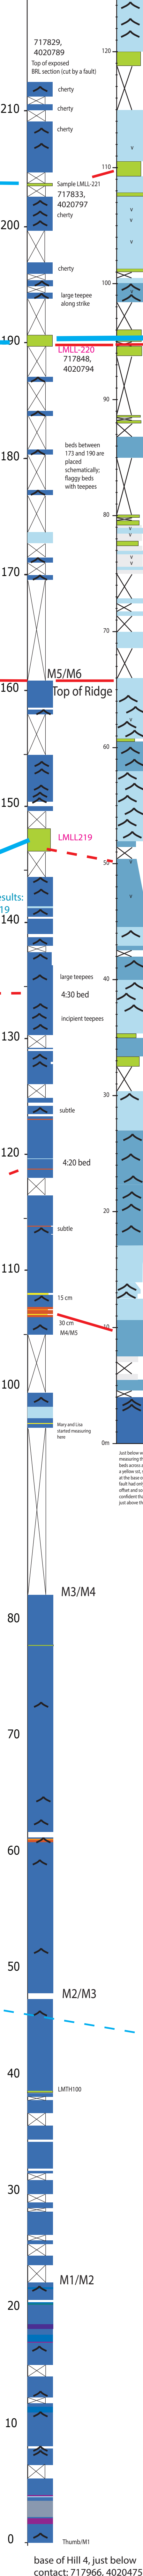

## PC

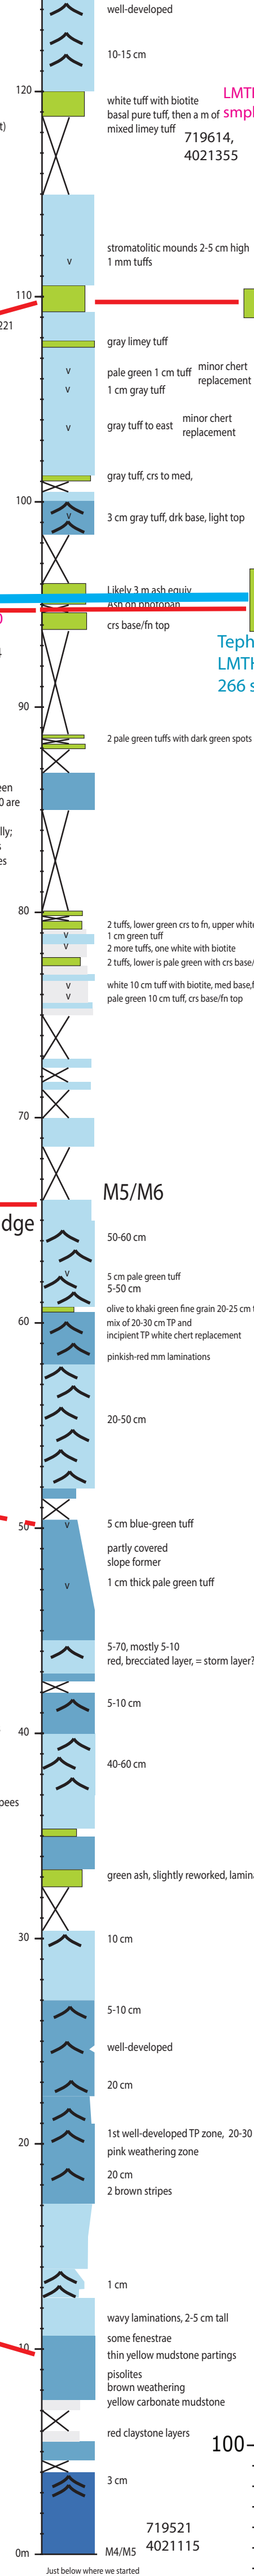

## HH

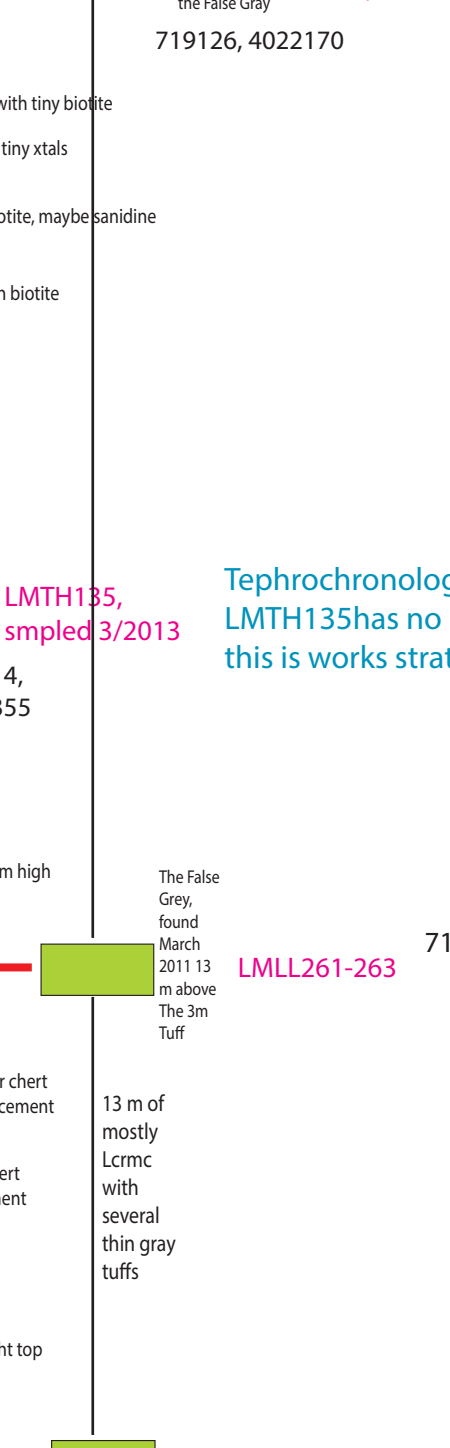

## PR

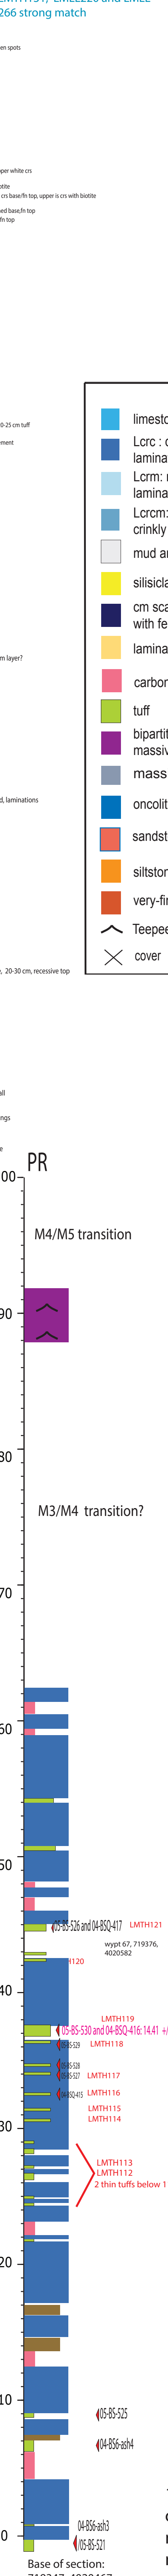

13.86 Ma calculated age of top of Brl using sedimentation rate of 377 m/My

sedimentation rate  
13.89+/- 0.20

Going from 14.41 to 13.89 = 196 m in .52 My = sed rate of 377 m/My

- Legend
- limestone undifferentiated
  - Lcrrc : cm scale crinkly laminated limestone
  - Lcrrm : mm scale crinkly laminated limestone
  - Lcrrcm : mixed mm and cm scale crinkly laminated limestone
  - mud and limestone
  - siliciclastic mudstone
  - cm scale crinkly laminated limestone with fenestrae
  - laminated evaporite
  - carbonate mudstone
  - tuff
  - bipartite beds: lower part laminated to massive with upper part very porous
  - massive limestone
  - oncolitic limestone
  - sandstone
  - siltstone
  - very-fine sandstone
  - Teepees
  - cover

these four units are all almost identical

14.50 Ma calculated age of start of Brl using sedimentation rate of 377 m/My

14.41+/- 0.10
