# Supplementary material
Source: publisher figshare collection journal article supplement (https://gsapubs.figshare.com/articles/dataset/_/20224125)

South

F

X

IX

VIII

VII

VI

V

IV

III

II

I

North

Lovell Wash Member Correlations  
and Major Stratigraphic Packages

East side of White Basin

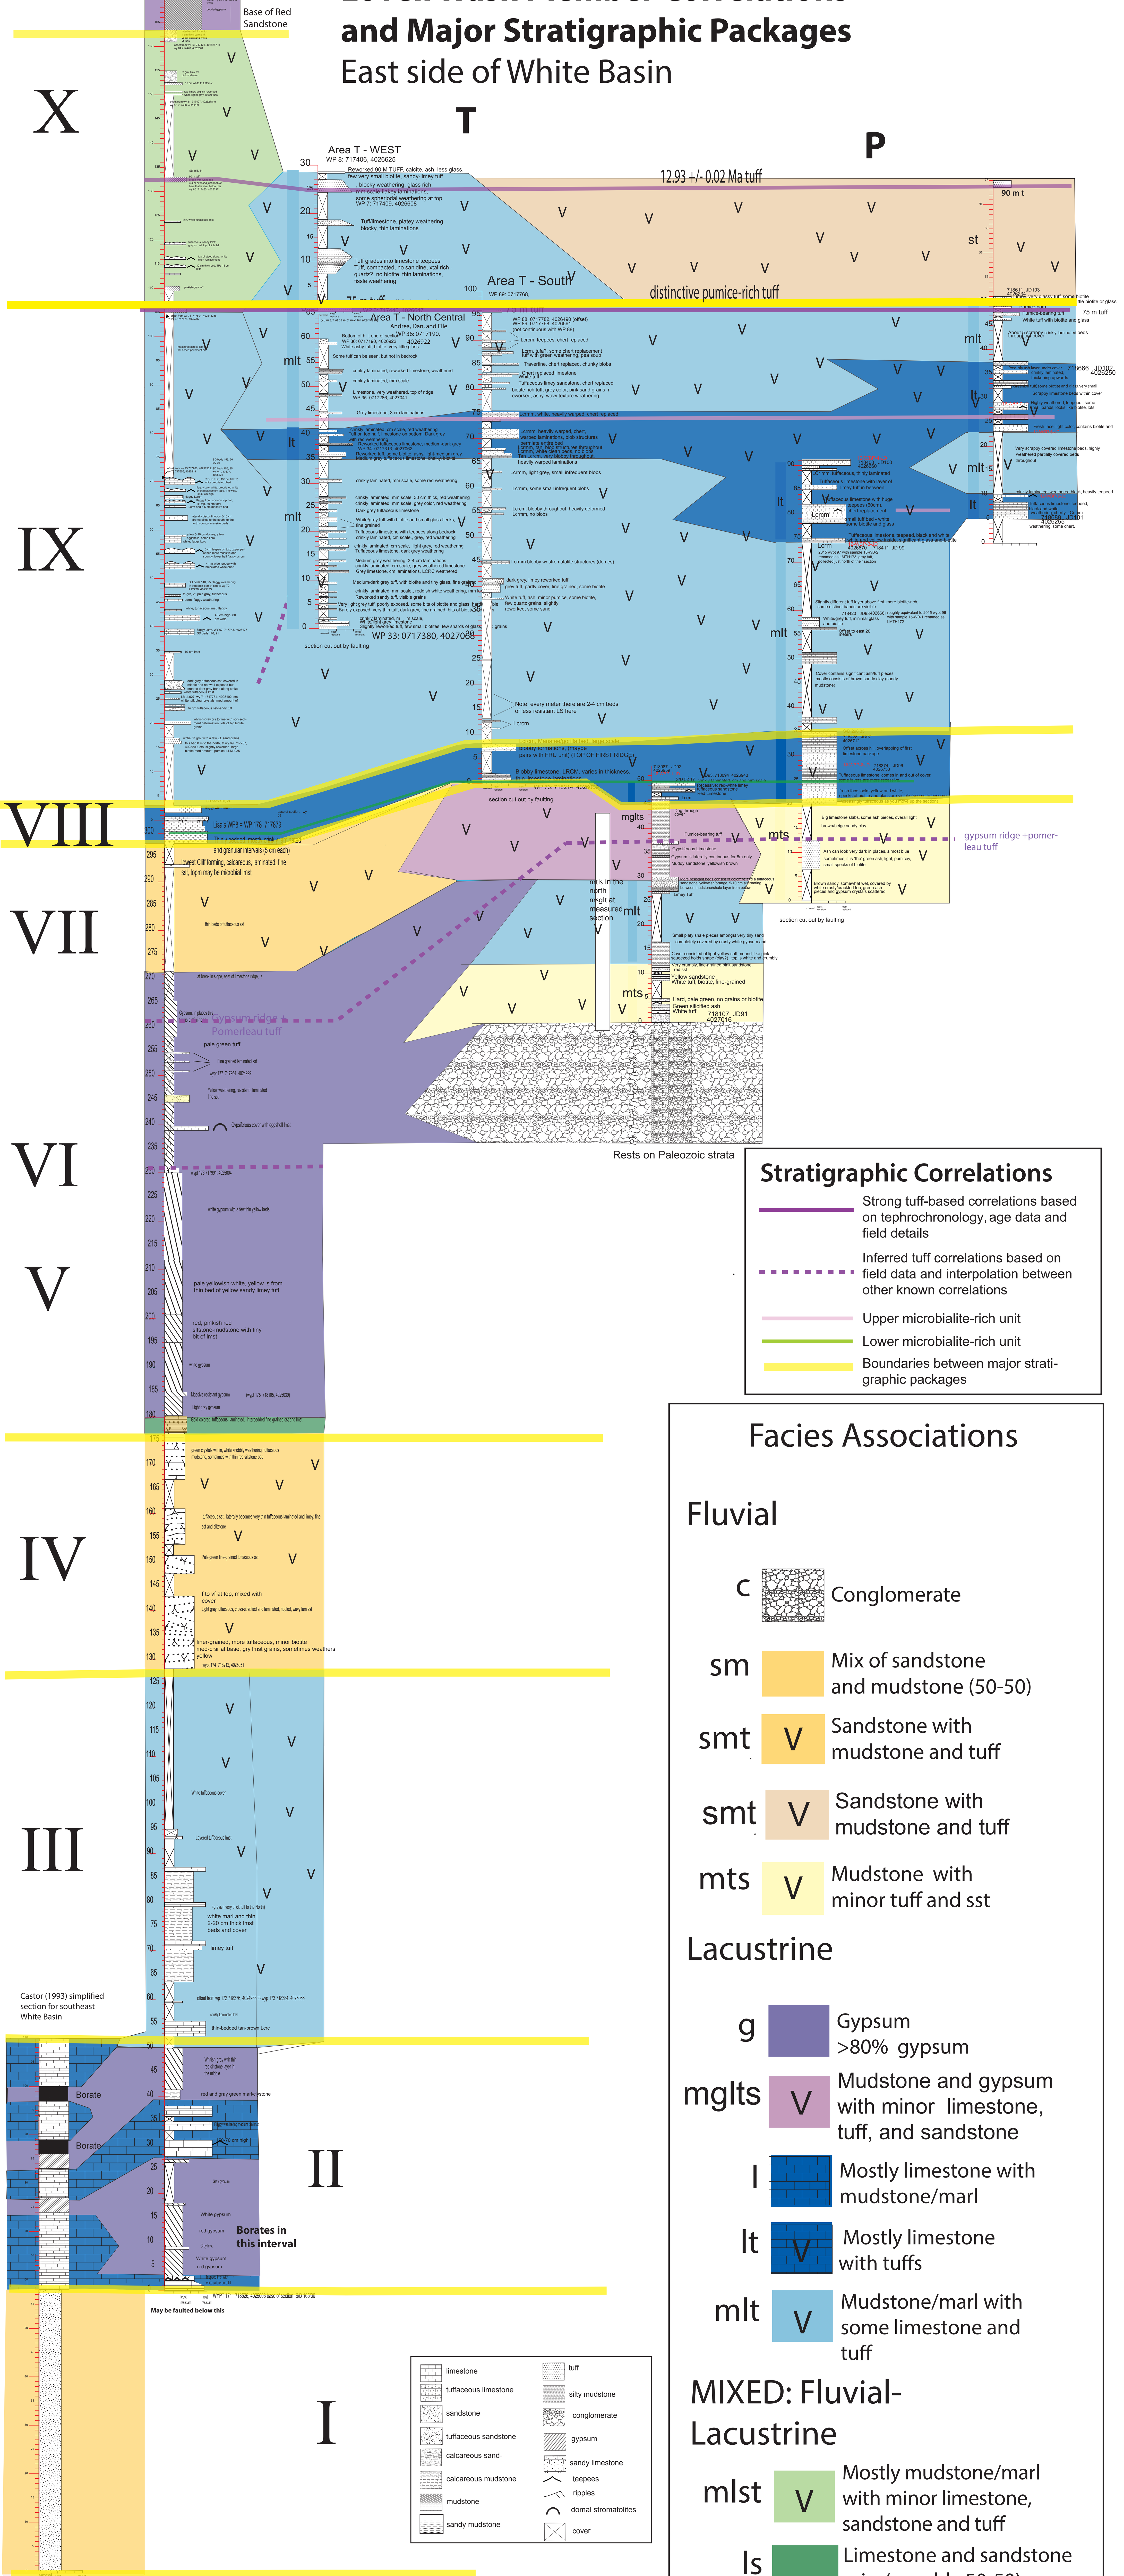

Supplement: Supplementary file 3 [file 1]
