# Supplementary material
Source: publisher figshare collection journal article supplement (https://gsapubs.figshare.com/articles/dataset/_/20224125)

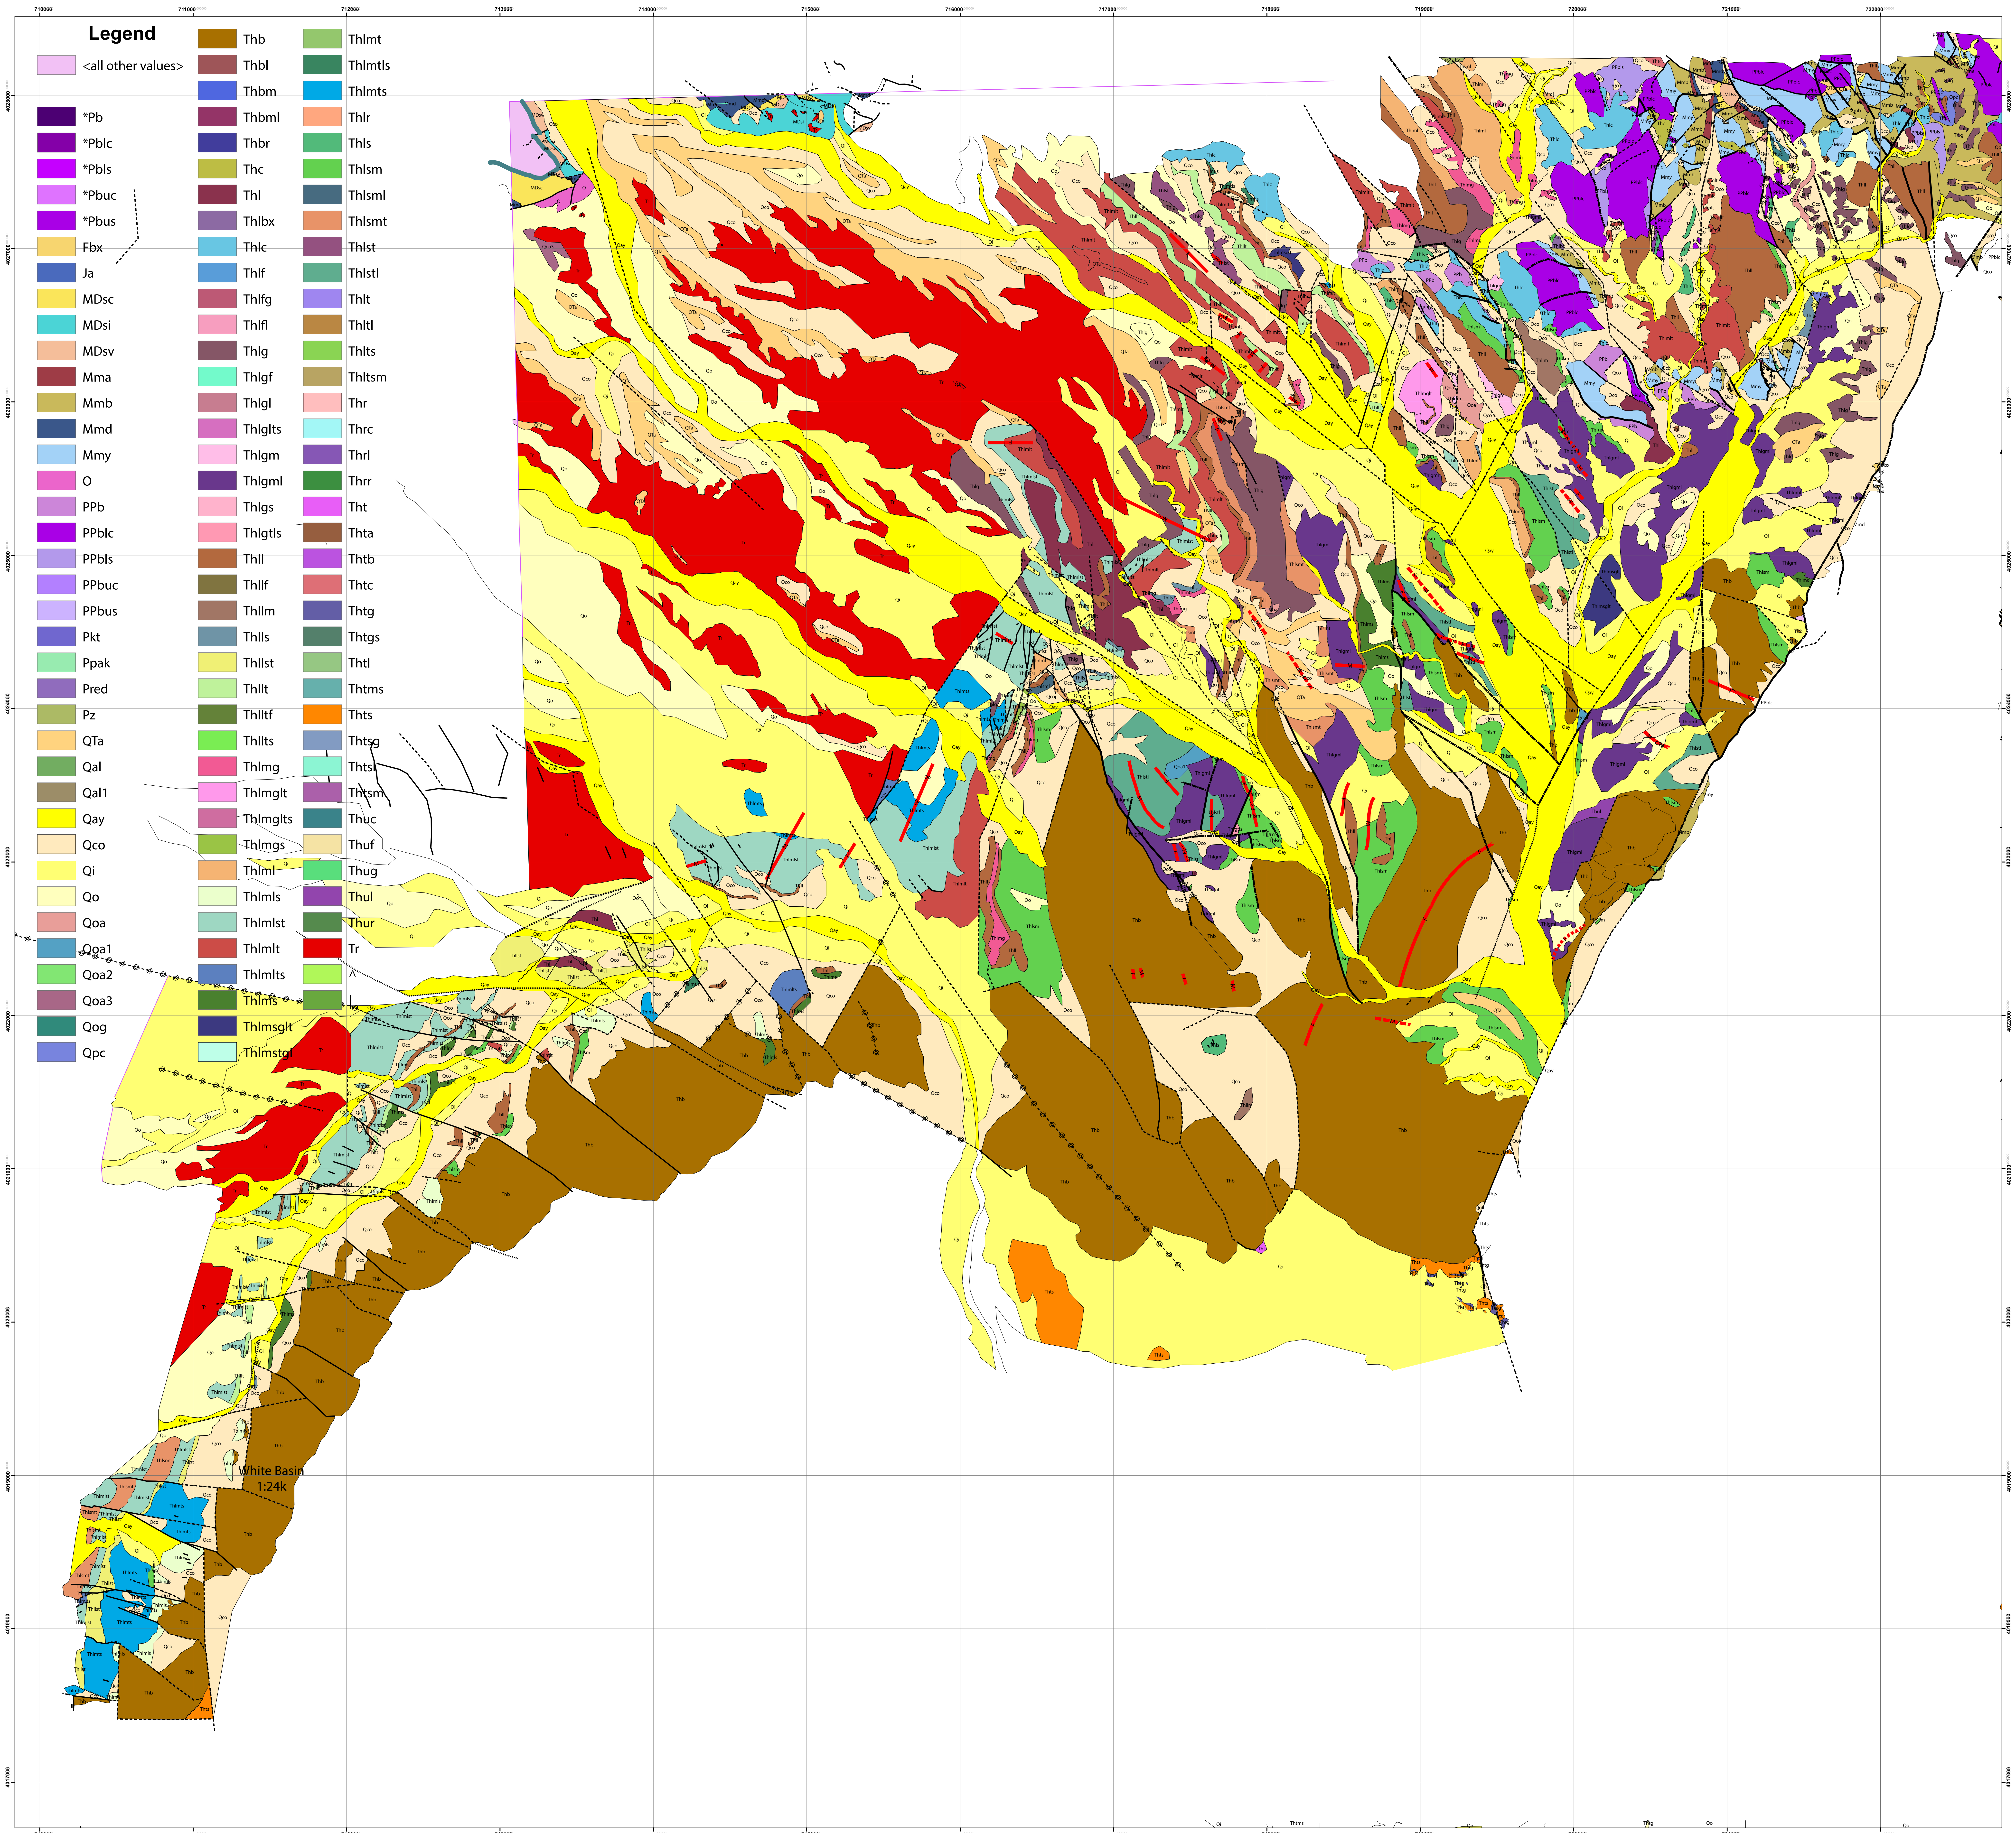

Supplement: Supplementary file 7 [file 1]
